# Supplementary material for: Treatment of mantle cell lymphoma in Asia: a consensus paper from the Asian Lymphoma Study Group
Source: PubMed Central journal article supplement (PMC7079508; doi:10.1186/s13045-020-00855-9), 2020-03-17
Supplement: 13045_2020_855_MOESM1_ESM.pdf [file 13045_2020_855_MOESM1_ESM.pdf]

## Supplementary Appendix

**Table.** Specifically used regimens in Asia

| Location  | Induction therapy in young, fit patients                                               | Induction therapy in older, unfit patients                                                       | Maintenance therapy                  | Relapsed/refractory MCL 2nd-line | Relapsed/refractory MCL later line |
|-----------|----------------------------------------------------------------------------------------|--------------------------------------------------------------------------------------------------|--------------------------------------|----------------------------------|------------------------------------|
| China     | Alternating R-CHOP and R-DHAP followed by auto-HSCT                                    | R-CHOP or lenalidomide                                                                           | CAR-T used in clinical trial setting | Ibrutinib                        | Lenalidomide                       |
| Hong Kong | R-hyperCVAD or R-BAC; auto-HSCT                                                        | R-BAC if patient cannot tolerate ara-C; BR in very old, unfit patients; IR if patient can afford | Rituximab used in some patients      | Ibrutinib                        | Bendamustine, ara-C or venetoclax  |
| Taiwan    | Hyper-CVAD or high-dose ara-C or CHOP (rituximab not reimbursed) followed by auto-HSCT | CHOP or CVP, VR-CAP may be an option                                                             | N/A                                  | Ara-C                            | Ara-C                              |
| Japan     | R-CHOP followed by CHASER then auto-HSCT                                               | BR (mostly) or VR-CAP (less common)                                                              | Rituximab recommended per guidelines | Ibrutinib                        | Bendamustine, CHOP, or R-CHOP      |
| Korea     | R-CHOP followed by high-dose ara-C then HSCT; BR preferred but not reimbursed          | VR-CAP or R-CHOP followed by high-dose ara-C; BR preferred but not reimbursed                    | Rituximab used in some patients      | Ibrutinib                        | Bortezomib, lenalidomide or ara-C  |

Ara-C, cytarabine; Auto-HSCT, autologous hematopoietic stem cell transplantation; BR, bendamustine, rituximab; CAR-T, chimeric antigen receptor T-cell; CHOP, cyclophosphamide, doxorubicin, vincristine, prednisone; CVP, cyclophosphamide, vincristine, prednisone; MCL, mantle cell lymphoma; R-BAC, rituximab, cytarabine, bendamustine; R-CHOP, rituximab, cyclophosphamide, doxorubicin, vincristine, prednisone; R-DHAP, rituximab, dexamethasone, cytarabine, cisplatin;

R-HyperCVAD, rituximab, hyperfractionated cyclophosphamide, vincristine, doxorubicin, dexametasone, alternating with high-dose methotrexate and cytarabine; VR-CAP, bortezomib, rituximab, cyclophosphamide, doxorubicin, prednisone.
